# Supplementary material
Source: MDPI journal article supplement (https://www.mdpi.com/2071-1050/12/3/873)
Supplement: s1 [file s1]

**Table S1.** Oxide composition for mixtures of reactive materials from systems analyzed after field tests.

| <b>Compound (%)</b>            | <b>System 1</b> | <b>System 2</b> | <b>System 3</b> |
|--------------------------------|-----------------|-----------------|-----------------|
| Na <sub>2</sub> O              | 0               | 2.599           | 0               |
| MgO                            | 1.566           | 0.161           | 1.543           |
| Al <sub>2</sub> O <sub>3</sub> | 1.308           | 3.918           | 0.996           |
| SiO <sub>2</sub>               | 1.467           | 29.693          | 1.742           |
| P <sub>2</sub> O <sub>5</sub>  | 0               | 0.386           | 0               |
| SO <sub>3</sub>                | 0.225           | 0.512           | 0.262           |
| Cl                             | 0.105           | 0.294           | 0.222           |
| K <sub>2</sub> O               | 0.072           | 1.236           | 0.057           |
| CaO                            | 16.117          | 1.158           | 27.952          |
| TiO <sub>2</sub>               | 0.071           | 0.104           | 0.086           |
| V <sub>2</sub> O <sub>5</sub>  | 0.006           | 0.005           | 0.007           |
| Cr <sub>2</sub> O <sub>3</sub> | 0.298           | 0.117           | 0.176           |
| MnO                            | 0.373           | 0.261           | 0.27            |
| Fe <sub>2</sub> O <sub>3</sub> | 65.257          | 45.874          | 48.586          |

**Table S2.** Varimax rotated factor matrix for the whole data set.

| Variable               | System 1     |             |             | System 2     |              |             |             |             | System 3      |               |               |              |              |
|------------------------|--------------|-------------|-------------|--------------|--------------|-------------|-------------|-------------|---------------|---------------|---------------|--------------|--------------|
|                        | VF1          | VF2         | VF3         | VF1          | VF2          | VF3         | VF4         | VF5         | VF1           | VF2           | VF3           | VF4          | VF5          |
| Cd (mg/L)              | -0.22        | 0.22        | <b>0.68</b> | 0.00         | 0.13         | <b>0.73</b> | -0.40       | 0.23        | 0.265         | -0.124        | -0.122        | 0.137        | <b>0.895</b> |
| Ni (mg/L)              | <b>0.80</b>  | -0.34       | 0.13        | <b>0.89</b>  | 0.02         | -0.06       | -0.14       | -0.07       | <b>-0.774</b> | -0.351        | -0.209        | 0.063        | 0.004        |
| Zn (mg/L)              | <b>0.88</b>  | 0.10        | -0.24       | 0.11         | -0.10        | -0.07       | <b>0.88</b> | 0.16        | -0.129        | 0.304         | 0.497         | -0.233       | <b>0.690</b> |
| COD (mg/L)             | <b>-0.65</b> | 0.30        | -0.63       | 0.01         | <b>0.76</b>  | -0.25       | -0.26       | -0.35       | <b>0.889</b>  | -0.003        | 0.317         | 0.030        | 0.090        |
| NH <sub>4</sub> (mg/L) | -0.38        | 0.00        | <b>0.81</b> | -0.05        | <b>-0.82</b> | -0.25       | -0.21       | 0.00        | 0.456         | 0.069         | <b>0.709</b>  | 0.243        | 0.055        |
| NO <sub>3</sub> (mg/L) | -0.21        | <b>0.45</b> | -0.03       | 0.12         | -0.12        | -0.07       | 0.10        | <b>0.88</b> | 0.434         | 0.868         | 0.043         | -0.020       | 0.084        |
| NO <sub>2</sub> (mg/L) | 0.10         | <b>0.88</b> | 0.04        | <b>0.91</b>  | 0.18         | 0.03        | 0.07        | -0.12       | 0.503         | <b>0.708</b>  | -0.164        | -0.279       | 0.080        |
| Fe (mg/L)              | 0.05         | -0.57       | <b>0.63</b> | -0.31        | -0.11        | <b>0.78</b> | 0.17        | -0.29       | 0.200         | -0.012        | 0.087         | <b>0.946</b> | 0.030        |
| SO <sub>4</sub> (mg/L) | <b>0.92</b>  | 0.20        | -0.29       | <b>0.90</b>  | -0.24        | -0.14       | 0.08        | 0.29        | -0.324        | <b>0.887</b>  | -0.119        | -0.204       | 0.023        |
| pH                     | <b>-0.78</b> | -0.05       | -0.41       | -0.15        | 0.36         | <b>0.65</b> | 0.00        | -0.57       | 0.506         | <b>-0.724</b> | 0.199         | -0.292       | 0.078        |
| EC (mS/C)              | <b>-0.85</b> | -0.27       | 0.24        | <b>-0.86</b> | 0.13         | 0.16        | -0.12       | -0.21       | <b>0.880</b>  | -0.195        | 0.093         | 0.196        | 0.111        |
| Eh (mV)                | 0.24         | <b>0.56</b> | 0.38        | -0.04        | <b>0.81</b>  | 0.05        | -0.14       | -0.06       | -0.196        | 0.310         | <b>-0.847</b> | 0.006        | 0.027        |
| T (°C)                 | 0.21         | <b>0.91</b> | -0.06       | 0.07         | <b>-0.65</b> | -0.05       | 0.19        | 0.63        | -0.051        | <b>0.965</b>  | -0.002        | 0.105        | -0.054       |
| k (m/s)                | <b>0.90</b>  | 0.01        | -0.28       | <b>0.96</b>  | 0.04         | -0.12       | 0.10        | 0.15        | <b>-0.906</b> | 0.113         | -0.067        | -0.233       | -0.092       |
| Eigenvalue             | 5.31         | 2.98        | 2.25        | 5.02         | 3.24         | 1.46        | 1.06        | 1.02        | 4.803         | 3.890         | 1.417         | 1.216        | 1.122        |
| Variability (%)        | 37.03        | 20.20       | 18.12       | 30.41        | 18.82        | 12.57       | 8.48        | 13.96       | 29.742        | 27.707        | 12.361        | 9.579        | 9.525        |
| Cumulative (%)         | 37.03        | 57.23       | 75.3        | 30.41        | 49.23        | 61.80       | 70.28       | 84.24       | 29.742        | 57.448        | 69.809        | 79.387       | 88.912       |
